# Supplementary material for: Upgrading Bio-Oil Produced from Corn Cobs and Cedrela odorata via Catalytic Olefination and Esterification with 3,7-Dimethyloct-1-ene and Butanol
Source: Hindawi journal article supplement (doi:10.1155/2019/9042425), 2019-04-01
Supplement: f1 [file 9042425.f1.docx]

**Supplementary information**

**Upgrading of bio-oil produced from corn cobs and *Cedrela odorata* via catalytic olefination and esterification with 3,7- dimethyloct-1-ene and butanol**

Folasegun. A. Dawodua, Olubunmi O. Ayodeleb*, John O. Akintolaa, Oluwamayokun A. Obembea, Ameerah O. Sannia, Bosede D. Agbejinmic

a Department of Chemistry [Industrial], University of Ibadan, Ibadan, Oyo State, Nigeria

b Department of Forest Products Development and Utilization, Forestry Research Institute of Nigeria, Ibadan, Oyo State, Nigeria

c Biotechnology Section, Bioscience, Department, Forestry Research Institute of Nigeria, Ibadan, Oyo State, Nigeria

To whom correspondence should be addressed: [bayodele2002@gmail.com](mailto:sjzhang@home.ipe.ac.cn)

**Table S1: Selected organic oxygen-containing components of raw bio-oil (corn cobs)**

| **Components** | **Area%** | **Component** | **Area%** |
| --- | --- | --- | --- |
| **Phenol** |  | **Ketone & Aldehyde** |  |
| Phenol, 2-ethyl | 2.774 | Cyclohexanone, 4-ethyl | 3.079 |
| Phenol, 4-ethyl | 9.716 | Propenone, 3-(2-benzoxazolylthio)-1-phenyl | 7.414 |
| Phenol, 3-ethyl | 6.532 | Hexanedial | 1.669 |
| 2-methoxylphenol | 6.983 | Hydroxyl-3- methoxy-benzaldehyde | 1.289 |
| Phenol, 2-methyl | 6.440 | 3-(4-hydroxy-2-methoxy-phenyl)-propenal | 0.311 |
| 4-Ethyl-2-methoxyl phenol | 11.864 | Methanone, (3,4-dimethylphenyl)(2,4,6-trimethylphenyl | 0.456 |
| **Acid** |  | 3-methyl-1,2-cyclopentanedione | 2.472 |
| Acetic acid | 8.022 | **Ester** **& Acetate** |  |
| Benzeneacetic acid | 4.087 | 10-Octadecenoic acid methyl ester | 1.019 |
| Tetradecanoic acid | 0.461 | Hexadecanoic acid, 2-hydroxy-, methyl ester | 1.768 |
| **Hydrocarbon** |  | 11,13-Dimethyl-12-tetradecen-1-ol acetate | 1.013 |
| butane1,1-dibutoxyl- | 2.422 | **Alcohol** |  |
| 1-Hexen-3-yne,2,5,5-trimethyl | 3.340 | 2,3,4,5-Tetrafluorobenzyl alcohol | 1.693 |
| **Furan** |  | 2,3-Dimethylcyclohexanol | 2.103 |
| 2,3-Dihydro benzofuran | 7.087 | 1,15-Pentadecaniol | 2.651 |
|  |  | 1,3-Propanediol, 2,2-dichloro-1-phenyl | 3.339 |
|  |  |  |  |

**Table S2: Selected organic oxygen-containing components of upgraded bio-oil (corncobs)**

| Components | Area% | Components | Area% |  |  |  |  |  |
| --- | --- | --- | --- | --- | --- | --- | --- | --- |
| Phenol |  | **Ketone and Aldehyde** |  |  |  |  |  |  |
| 4-Ethyl-2-methoxyl phenol | 6.566 | 2-Methyl-2-cyclopentenone | 5.617 |  |  |  |  |  |
| Phenol, 4-ethy | 2.782 | **Ester** |  |  |  |  |  |  |
| 2-methoxylphenol | 3.475 | Hexanoic acid, butyl ester | 5.270 |  |  |  |  |  |
| Acid |  | n-Butyl acetate | 17.956 |  |  |  |  |  |
| Acetic acid | 8.603 | Butanoic acid, octyl ester | 3.871 |  |  |  |  |  |
| Benzeneacetic acid | 2.417 | Hexanedioic acid, diisooctyl ester | 2.956 |  |  |  |  |  |
| Alcohol |  | n-Butyl formate | 10.320 |  |  |  |  |  |
| 1-Butanol | 8.608 | Pentanoic acid, butyl ester | 3.206 |  |  |  |  |  |
| 2,3-Dimethylcyclohexanol | 2.915 | 2,3-Dihydroxypropyl propionate | 2.432 |  |  |  |  |  |
| Furan |  | **Others** |  |  |  |  |  |  |
| 5-Methyl-2(3H)-furanone | 0.405 | Octene | 12.58 |  |  |  |  |  |

**Table S3: Selected organic oxygen-containing components of raw bio-oil (*cedrela odorata*)**

| **Components** | **Area%** | **Component** | **Area%** |
| --- | --- | --- | --- |
| **Phenol** |  | **ketone & Aldehyde** |  |
| Phenol, 2,5-dimethyl | 9.189 | 3-Hydroxy-2-butanone | 3.149 |
| Phenol, 2,4-dimethyl | 2.681 | 3-Methyl-1,2-cyclopentanedione | 5.698 |
| Phenol,3-methyl | 3.423 | 2,2-Dimethyl-3-heptanone | 2.931 |
| Phenol, 2-ethyl- | 10.834 | Benzaldehyde,4-hydroxy-3,5-dimethyl | 9.648 |
| Phenol,4-ethyl | 11.184 | **Furan** |  |
| Phenol, 2-amino-5-nitro | 2.509 | 2,3-Dihydro-2,5-dimethylfuran | 5.993 |
| **Acid** |  | **Hydrocarbon** |  |
| Acetic acid | 12.185 | Butane,1,-dibutoxy | 4.165 |
| Tetradecanoic acid | 1.655 | **Ester** |  |
| 1,2-Benzenedicarboxylic acid | 2.035 | 3-Trimethylsilyloxystearic acid, trimethylsilyl ester | 2.105 |
| n-Hexadecanoic acid | 1.175 |  |  |
| **Others** |  |  |  |
| 3,4-Anhydro-D-galactosan | 9.441 |  |  |

**Table S4: Selected organic oxygen-containing components of upgraded bio-oil (*cedrela odorata*)**

| **Components** | **Area%** | **Components** | **Area** |
| --- | --- | --- | --- |
| **Phenol** |  | **Ketone and Aldehyde** |  |
| Phenol,4-methyl | 2.060 | 2-Allyl-2-methyl-1,3-cyclopentanedione | 8.353 |
| Phenol, 2,5-dimethyl | 11.519 | **Acid** |  |
| Phenol, 2-amino-5-nitro | 0.674 | Acetic acid | 12.663 |
| **Ester** |  | **Alcohol** |  |
| Butanoic acid, octyl ester | 17.252 | 1-butanol | 11.898 |
| Pentanoic acid, butyl ester | 10.140 | **Others** |  |
| Hexanoic acid, butyl ester | 10.728 | octene | 14.714 |


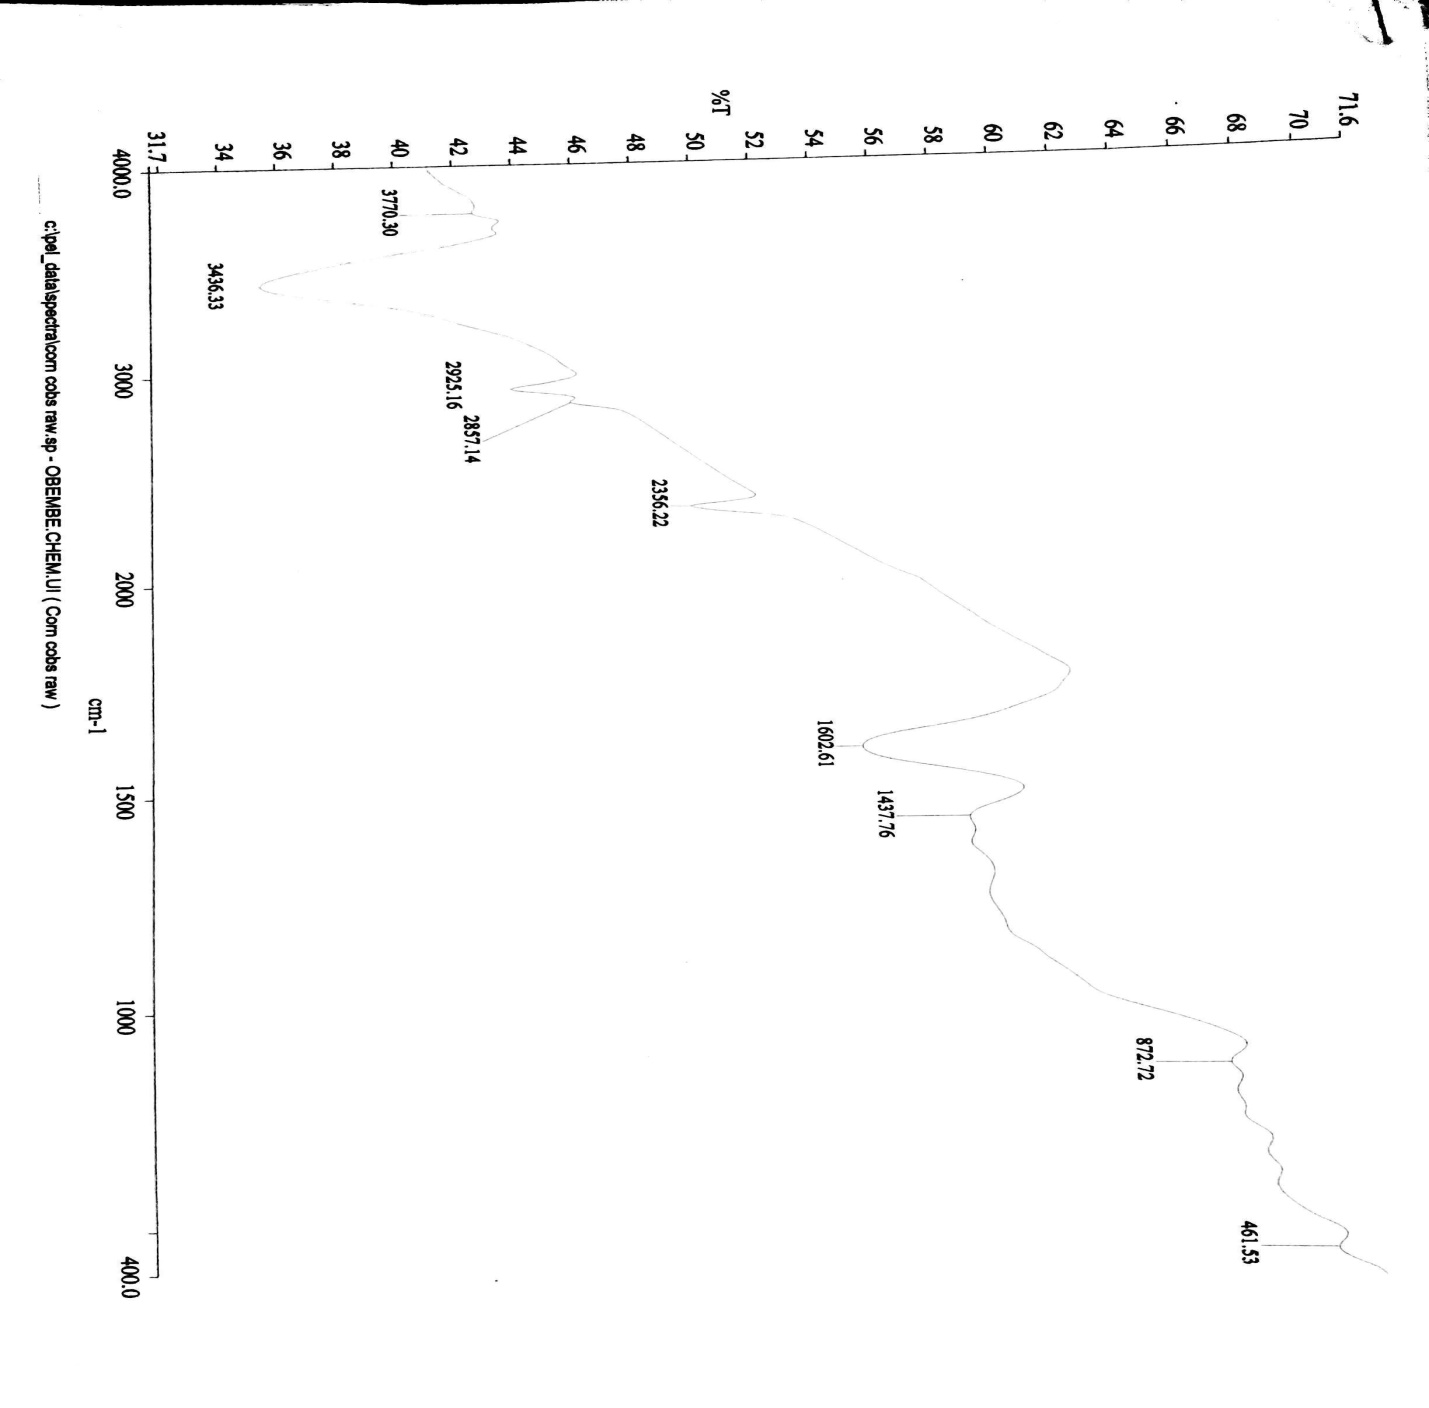


Fig. S1: FT-IR spectra of raw corn cobs


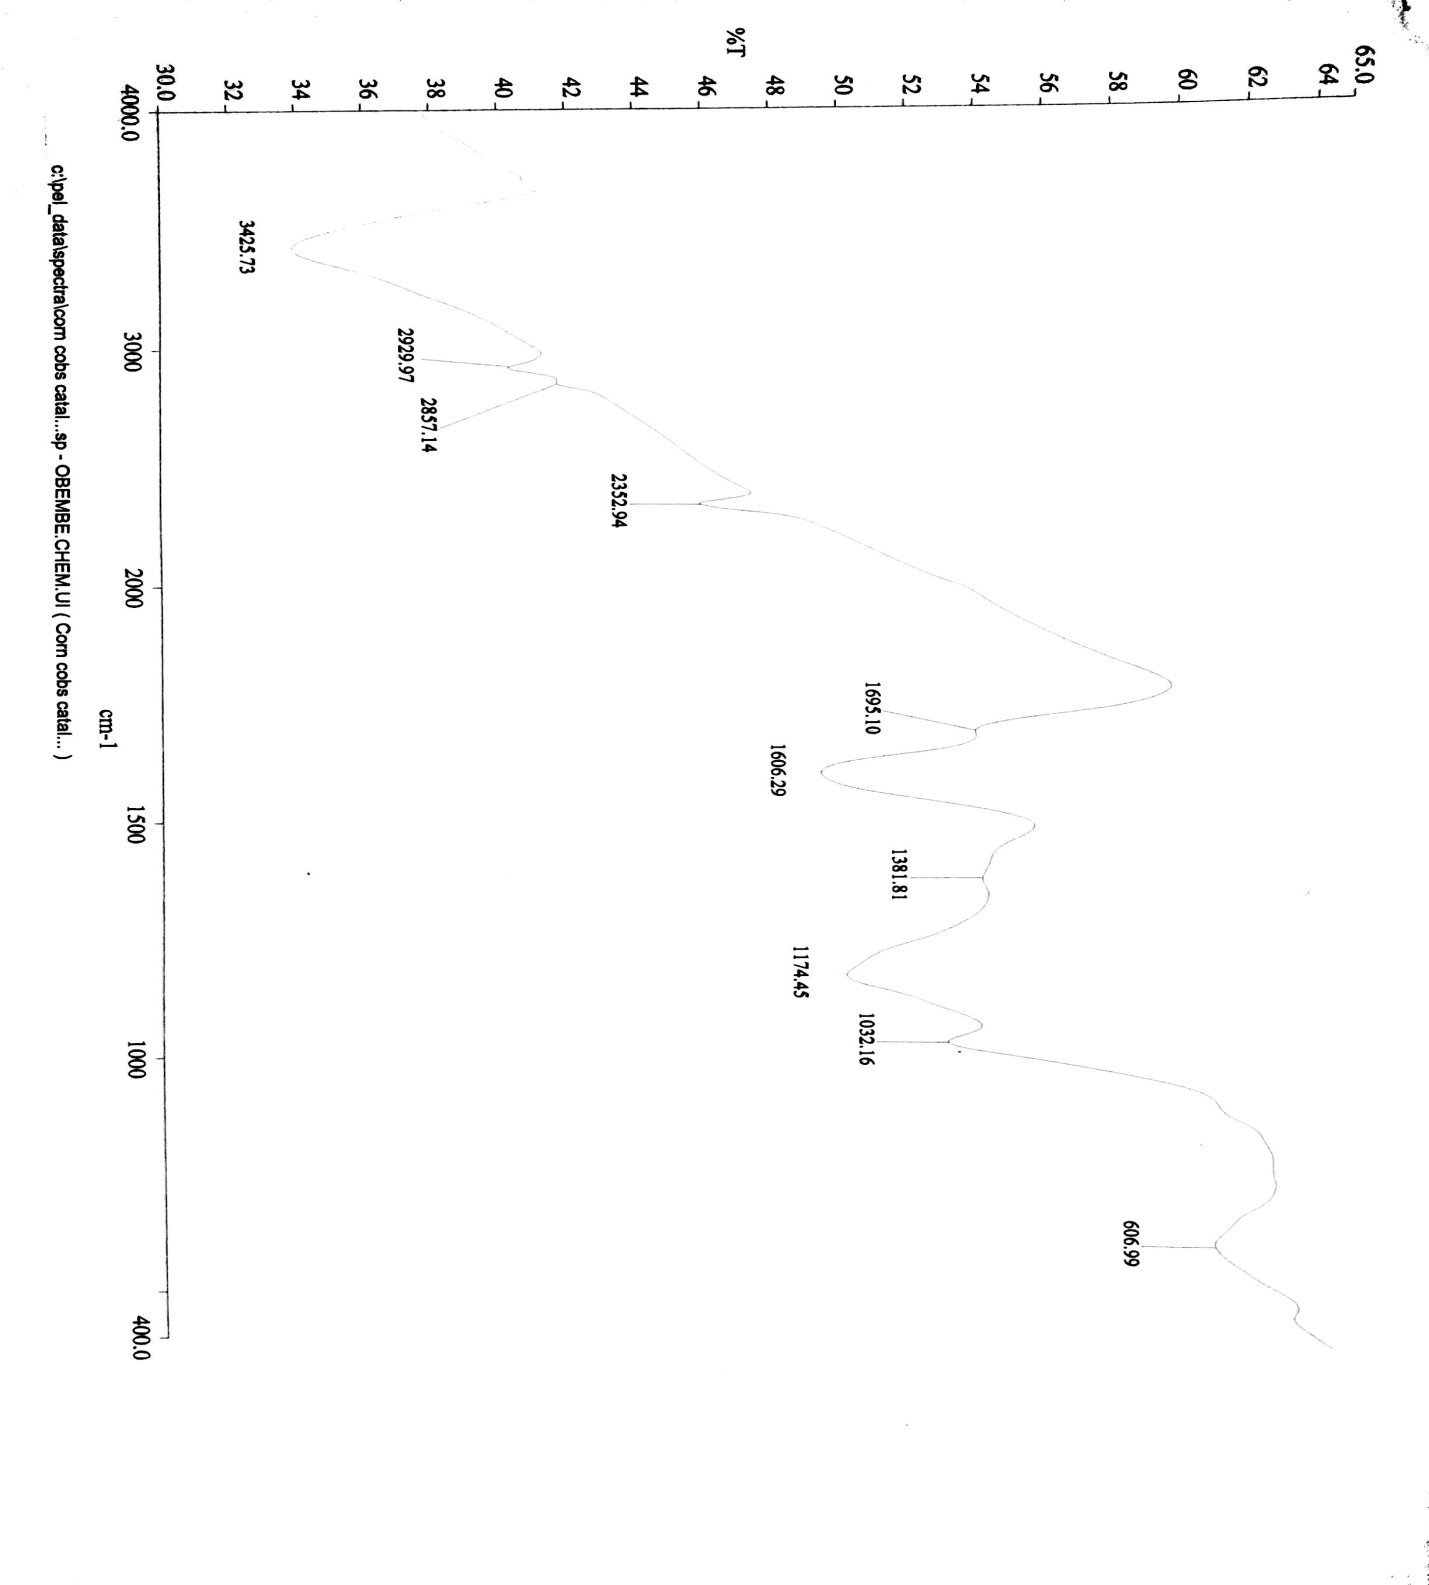


**S2:** FT-IR spectra of corn cobscatalyst


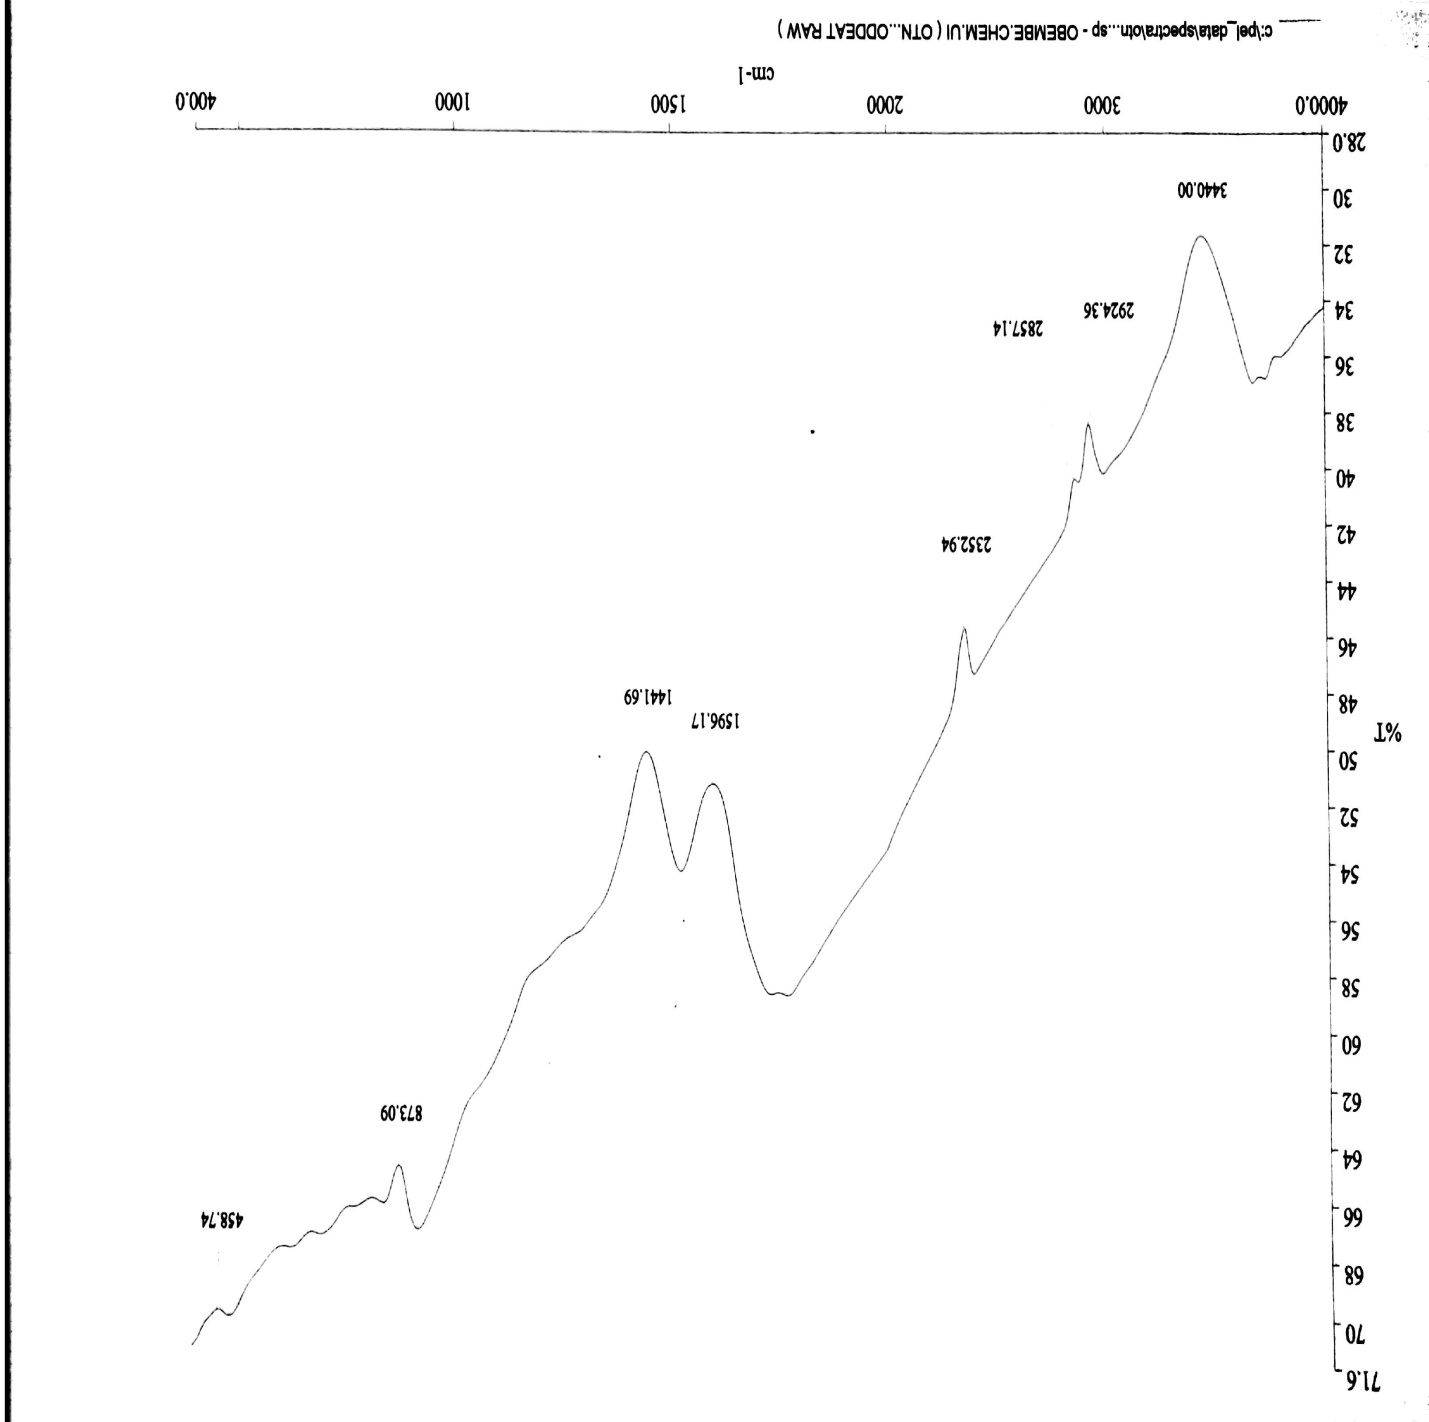


**S3:** FT-IR spectra of raw *Cedrela odorata*


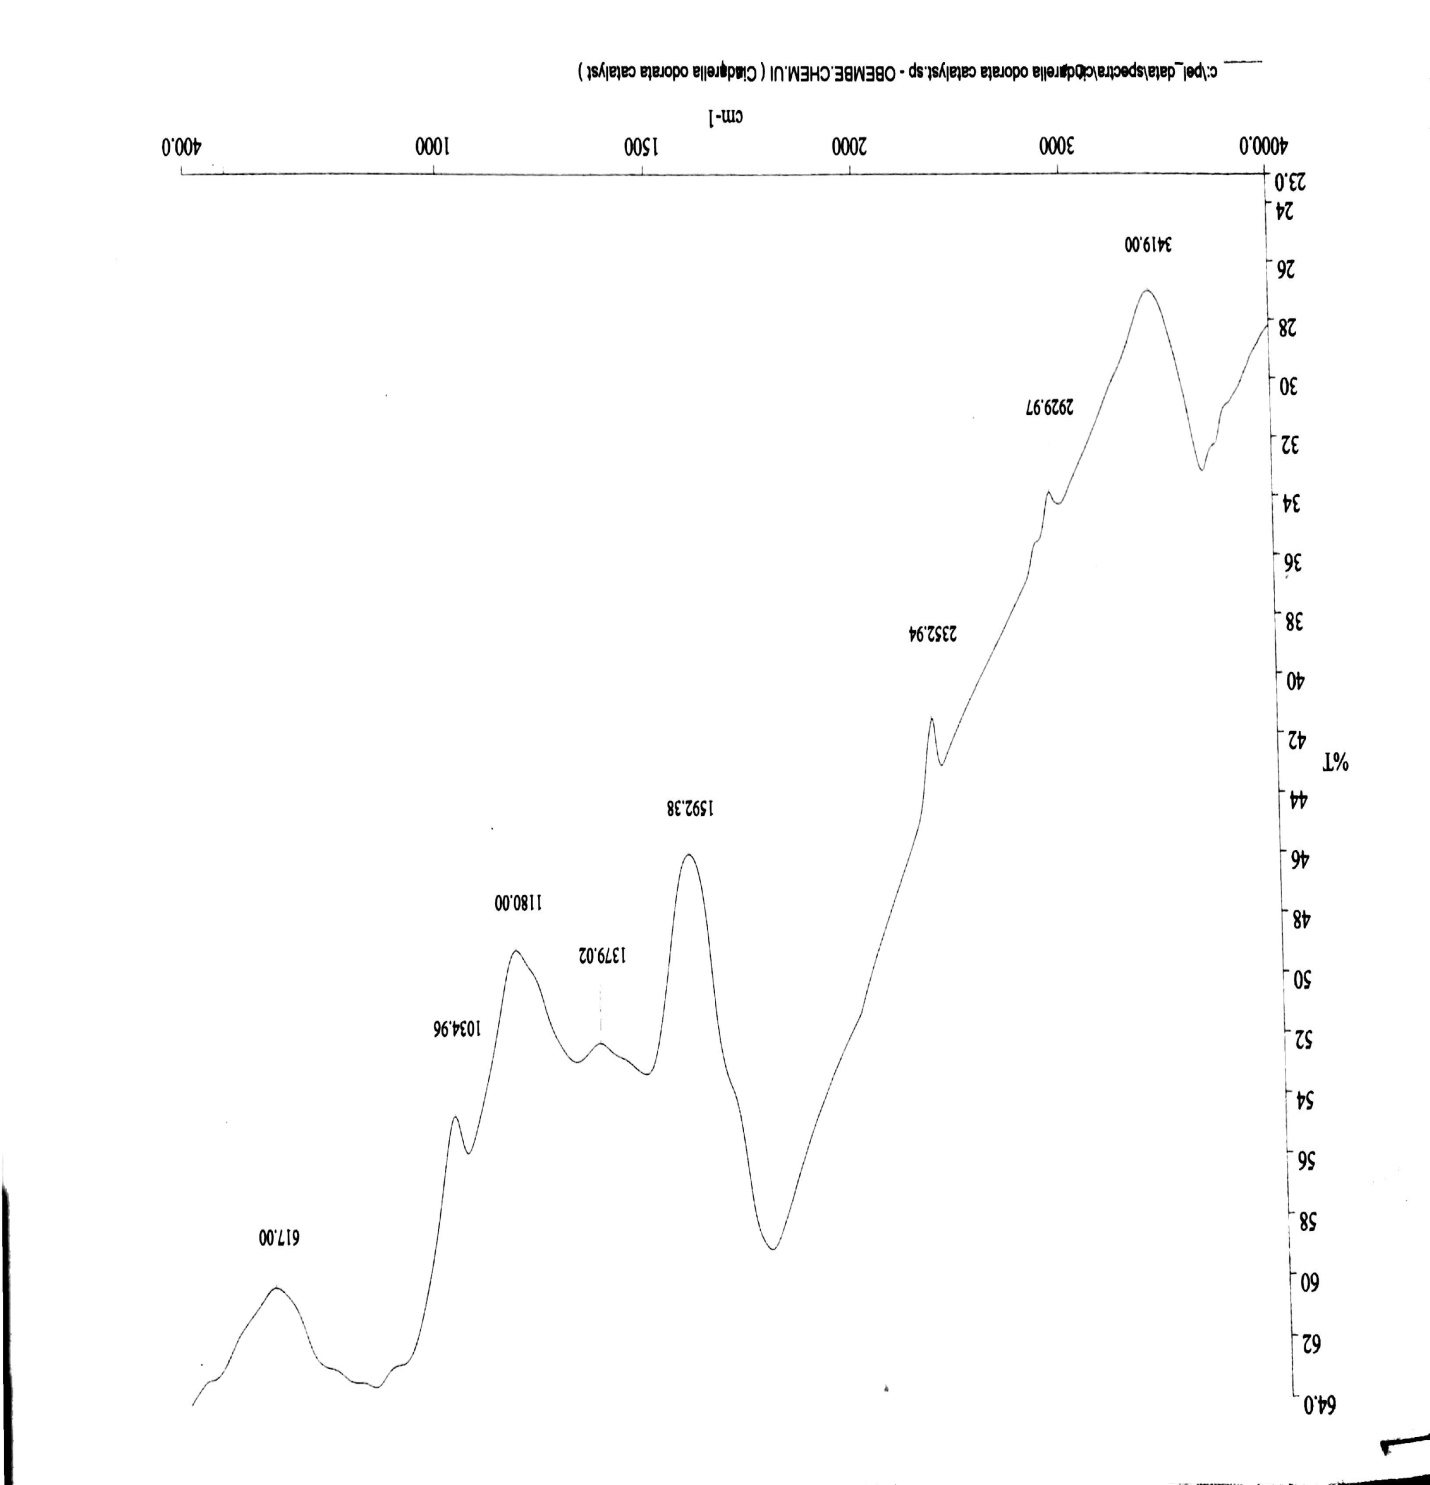


**S4:** FT-IR spectra of *Cedrela odorata* catalyst
